# Supplementary material for: Potentially Toxic Metals in the High-Biomass Non-Hyperaccumulating Plant Amaranthus viridis: Human Health Risks and Phytoremediation Potentials
Source: MDPI journal article supplement (doi:10.3390/biology11030389), 2022-03-01
Supplement: s1 [file s1]

## **Supplementary Materials**

# **Potentially Toxic Metals in the High-Biomass Non-Hyperaccumulating Plant *Amaranthus viridis*: Human Health Risks and Phytoremediation Potentials**

Chee Kong Yap <sup>1,\*</sup>, Aziran Yaacob <sup>1</sup>, Wen Siang Tan <sup>2,3</sup>, Khalid Awadh Al-Mutairi <sup>4</sup>, Wan Hee Cheng <sup>5</sup>, Koe Wei Wong <sup>1</sup>, Franklin Berandah Edward <sup>6</sup>, Mohamad Saupi Ismail <sup>7</sup>, Chen Feng You <sup>8</sup>, Weiyun Chew <sup>9</sup>, Rosimah Nulit <sup>1</sup>, Mohd. Hafiz Ibrahim <sup>1</sup>, Bintal Amin <sup>10</sup> and Moslem Sharifinia <sup>11</sup>

**S-1.** Overall concentrations (mean  $\pm$  SE,  $\mu\text{g/g}$  dry weight) of heavy metals (Cd, Fe, Ni, and Zn) in the leaves, stems and roots of *Amaranthus viridis* collected from Peninsular Malaysia. WW= converted to wet weight basis.

| <b>Cd</b> | <b>Leaves</b> | <b>WW</b> | <b>Stems</b> | <b>WW</b> | <b>Roots</b> | <b>WW</b> |
|-----------|---------------|-----------|--------------|-----------|--------------|-----------|
| Min       | 0.45          | 0.05      | 0.28         | 0.02      | 0.70         | 0.08      |
| Max       | 2.18          | 0.26      | 1.77         | 0.11      | 2.46         | 0.27      |
| Mean      | 1.04          | 0.12      | 0.80         | 0.05      | 1.44         | 0.16      |
| SE        | 0.14          | -         | 0.15         | -         | 0.15         | -         |
| Skewness  | 1.40          | -         | 0.79         | -         | 0.54         | -         |
| Kurtosis  | 1.93          | -         | -0.53        | -         | -0.27        | -         |
| <b>Fe</b> | <b>Leaves</b> | <b>WW</b> | <b>Stems</b> | <b>WW</b> | <b>Roots</b> | <b>WW</b> |
| Min       | 74.8          | 8.97      | 27.7         | 1.66      | 102          | 11.2      |
| Max       | 535           | 64.2      | 174          | 10.5      | 988          | 109       |
| Mean      | 159           | 19.1      | 64.9         | 3.90      | 320          | 35.2      |
| SE        | 39.0          | -         | 12.4         | -         | 78.0         | -         |
| Skewness  | 2.49          | -         | 1.93         | -         | 1.65         | -         |
| Kurtosis  | 4.92          | -         | 2.72         | -         | 1.73         | -         |
| <b>Ni</b> | <b>Leaves</b> | <b>WW</b> | <b>Stems</b> | <b>WW</b> | <b>Roots</b> | <b>WW</b> |
| Min       | 2.02          | 0.24      | 0.37         | 0.02      | 1.12         | 0.12      |
| Max       | 7.45          | 0.89      | 2.81         | 0.17      | 6.61         | 0.73      |
| Mean      | 4.68          | 0.56      | 1.67         | 0.10      | 3.86         | 0.42      |
| SE        | 0.56          | -         | 0.26         | -         | 0.56         | -         |
| Skewness  | -0.06         | -         | -0.11        | -         | -0.17        | -         |
| Kurtosis  | -1.29         | -         | -1.31        | -         | -1.09        | -         |
| <b>Zn</b> | <b>Leaves</b> | <b>WW</b> | <b>Stems</b> | <b>WW</b> | <b>Roots</b> | <b>WW</b> |
| Min       | 65.2          | 7.83      | 52.2         | 3.13      | 55.7         | 6.13      |
| Max       | 521           | 62.6      | 341          | 20.5      | 357          | 39.3      |
| Mean      | 237           | 28.5      | 134          | 8.02      | 148          | 16.3      |
| SE        | 54.3          | -         | 26.6         | -         | 27.4         | -         |
| Skewness  | 0.54          | -         | 1.16         | -         | 1.09         | -         |
| Kurtosis  | -1.40         | -         | 0.68         | -         | 0.48         | -         |

Note: The dry weights of leaves, roots and stems were converted into wet weight (WW) basis by using conversion factors of 0.12, 0.11, and 0.06, respectively.  
Min= Minimum; Max= Maximum; SE= Standard error.

**S-2.** Concentration (Mean  $\pm$  SE,  $\mu\text{g/g}$  dry weight) of Cd in the geochemical fractions of the habitat topsoils of *Amaranthus viridis* collected from all sampling sites in Peninsular Malaysia.

| No. | EFLE |       |      | AR   |       |      | OO   |       |      | RES  |       |      | SUM  | NR (%) | RES (%) |
|-----|------|-------|------|------|-------|------|------|-------|------|------|-------|------|------|--------|---------|
| 1   | 0.18 | $\pm$ | 0.00 | 0.27 | $\pm$ | 0.02 | 0.32 | $\pm$ | 0.00 | 2.22 | $\pm$ | 0.01 | 2.99 | 2.64   | 74.16   |
| 2   | 0.26 | $\pm$ | 0.01 | 0.45 | $\pm$ | 0.02 | 0.81 | $\pm$ | 0.06 | 2.52 | $\pm$ | 0.01 | 4.03 | 3.98   | 62.40   |
| 3   | 0.29 | $\pm$ | 0.01 | 0.35 | $\pm$ | 0.06 | 0.26 | $\pm$ | 0.01 | 4.00 | $\pm$ | 0.01 | 4.90 | 4.55   | 81.69   |
| 4   | 0.37 | $\pm$ | 0.02 | 0.48 | $\pm$ | 0.07 | 0.68 | $\pm$ | 0.04 | 3.64 | $\pm$ | 0.01 | 5.17 | 5.14   | 70.43   |
| 5   | 0.45 | $\pm$ | 0.02 | 0.55 | $\pm$ | 0.01 | 0.81 | $\pm$ | 0.05 | 2.97 | $\pm$ | 0.00 | 4.78 | 4.71   | 62.15   |
| 6   | 0.26 | $\pm$ | 0.01 | 0.55 | $\pm$ | 0.02 | 1.33 | $\pm$ | 0.03 | 1.65 | $\pm$ | 0.00 | 3.80 | 3.42   | 43.56   |
| 7   | 0.22 | $\pm$ | 0.01 | 0.67 | $\pm$ | 0.01 | 0.83 | $\pm$ | 0.05 | 2.59 | $\pm$ | 0.00 | 4.31 | 4.19   | 60.03   |
| 8   | 0.18 | $\pm$ | 0.01 | 0.71 | $\pm$ | 0.01 | 0.42 | $\pm$ | 0.02 | 2.00 | $\pm$ | 0.00 | 3.32 | 3.27   | 60.38   |
| 9   | 0.21 | $\pm$ | 0.01 | 0.24 | $\pm$ | 0.02 | 0.54 | $\pm$ | 0.06 | 1.12 | $\pm$ | 0.00 | 2.11 | 2.28   | 52.85   |
| 10  | 0.36 | $\pm$ | 0.01 | 0.45 | $\pm$ | 0.01 | 0.67 | $\pm$ | 0.05 | 1.44 | $\pm$ | 0.00 | 2.92 | 2.94   | 49.34   |
| 11  | 0.28 | $\pm$ | 0.02 | 0.29 | $\pm$ | 0.01 | 0.34 | $\pm$ | 0.01 | 1.97 | $\pm$ | 0.00 | 2.88 | 2.80   | 68.45   |

Note: EFLE= easily, freely, leachable or exchangeable; AR= acid-reducible; OO- oxidisable-organic; RES= resistant; SUM= summation of the four geochemical fractions; NR= nonresistant.

**S-3.** Concentration (mean  $\pm$  SE,  $\mu\text{g/g}$  dry weight) of Fe in the geochemical fractions of the habitat topsoils of *Amaranthus viridis* collected from all sampling sites in Peninsular Malaysia.

| No. | EFLE |       |      | AR   |       |      | OO  |       |      | RES   |       |      | SUM   | NR (%) | RES (%) |
|-----|------|-------|------|------|-------|------|-----|-------|------|-------|-------|------|-------|--------|---------|
| 1   | 0.78 | $\pm$ | 0.11 | 205  | $\pm$ | 3.90 | 232 | $\pm$ | 4.91 | 9733  | $\pm$ | 489  | 10171 | 4.31   | 95.69   |
| 2   | 0.40 | $\pm$ | 0.06 | 163  | $\pm$ | 3.55 | 182 | $\pm$ | 3.12 | 8084  | $\pm$ | 130  | 8430  | 4.10   | 95.90   |
| 3   | 0.77 | $\pm$ | 0.07 | 27.9 | $\pm$ | 1.51 | 131 | $\pm$ | 10.7 | 58216 | $\pm$ | 2097 | 58375 | 0.27   | 99.73   |
| 4   | 1.31 | $\pm$ | 0.40 | 26.5 | $\pm$ | 1.36 | 105 | $\pm$ | 3.33 | 49731 | $\pm$ | 2567 | 49864 | 0.27   | 99.73   |
| 5   | 0.67 | $\pm$ | 0.00 | 144  | $\pm$ | 6.64 | 229 | $\pm$ | 20.9 | 32528 | $\pm$ | 359  | 32902 | 1.14   | 98.86   |
| 6   | 1.39 | $\pm$ | 0.54 | 153  | $\pm$ | 2.09 | 138 | $\pm$ | 2.41 | 15826 | $\pm$ | 638  | 16118 | 1.81   | 98.19   |
| 7   | 0.55 | $\pm$ | 0.06 | 119  | $\pm$ | 7.12 | 133 | $\pm$ | 2.88 | 20035 | $\pm$ | 108  | 20288 | 1.25   | 98.75   |
| 8   | 0.82 | $\pm$ | 0.12 | 172  | $\pm$ | 12.3 | 142 | $\pm$ | 7.77 | 18215 | $\pm$ | 986  | 18530 | 1.70   | 98.30   |
| 9   | 0.43 | $\pm$ | 0.11 | 150  | $\pm$ | 10.0 | 179 | $\pm$ | 2.44 | 16697 | $\pm$ | 217  | 17026 | 1.93   | 98.07   |
| 10  | 0.43 | $\pm$ | 0.06 | 199  | $\pm$ | 3.44 | 205 | $\pm$ | 2.14 | 11016 | $\pm$ | 429  | 11421 | 3.54   | 96.46   |
| 11  | 0.45 | $\pm$ | 0.08 | 216  | $\pm$ | 2.77 | 244 | $\pm$ | 16.5 | 40566 | $\pm$ | 1134 | 41027 | 1.12   | 98.88   |

Note: EFLE= easily, freely, leachable or exchangeable; AR= acid-reducible; OO- oxidisable-organic; RES= resistant; SUM= summation of the four geochemical fractions; NR= nonresistant.

**S-4.** Concentration (mean  $\pm$  SE,  $\mu\text{g/g}$  dry weight) of Ni in the geochemical fractions of the habitat topsoils of *Amaranthus viridis* collected from all sampling sites in Peninsular Malaysia.

| No. | EFLE |       |      | AR   |       |      | OO   |       |      | RES   |       |      | SUM   | NR (%) | RES (%) |
|-----|------|-------|------|------|-------|------|------|-------|------|-------|-------|------|-------|--------|---------|
| 1   | 0.65 | $\pm$ | 0.03 | 0.5  | $\pm$ | 0.01 | 2.43 | $\pm$ | 0.19 | 7.03  | $\pm$ | 0.26 | 10.6  | 33.73  | 66.27   |
| 2   | 0.72 | $\pm$ | 0.02 | 0.2  | $\pm$ | 0.02 | 5.08 | $\pm$ | 0.05 | 8.95  | $\pm$ | 0.04 | 14.94 | 40.13  | 59.87   |
| 3   | 0.25 | $\pm$ | 0.05 | 0.43 | $\pm$ | 0.02 | 2.61 | $\pm$ | 0.58 | 5.69  | $\pm$ | 0.75 | 8.99  | 36.68  | 63.32   |
| 4   | 0.85 | $\pm$ | 0.01 | 0.3  | $\pm$ | 0.01 | 3.21 | $\pm$ | 0.12 | 3.71  | $\pm$ | 0.19 | 8.07  | 54.05  | 45.95   |
| 5   | 0.76 | $\pm$ | 0.02 | 0.92 | $\pm$ | 0.01 | 7.51 | $\pm$ | 0.04 | 4.84  | $\pm$ | 0.27 | 14.03 | 65.52  | 34.48   |
| 6   | 0.73 | $\pm$ | 0.01 | 1.75 | $\pm$ | 0.02 | 6.71 | $\pm$ | 0.21 | 5.63  | $\pm$ | 0.14 | 14.82 | 62.03  | 37.97   |
| 7   | 1.53 | $\pm$ | 0.24 | 0.45 | $\pm$ | 0.05 | 3.67 | $\pm$ | 0.05 | 5.62  | $\pm$ | 0.03 | 11.27 | 50.1   | 49.9    |
| 8   | 0.95 | $\pm$ | 0.04 | 0.63 | $\pm$ | 0.03 | 3.63 | $\pm$ | 0.1  | 2.94  | $\pm$ | 0.25 | 8.15  | 63.91  | 36.09   |
| 9   | 1.57 | $\pm$ | 0.01 | 4.27 | $\pm$ | 0.12 | 6.26 | $\pm$ | 0.09 | 12.71 | $\pm$ | 1.02 | 24.81 | 48.78  | 51.22   |
| 10  | 1.7  | $\pm$ | 0.02 | 1.58 | $\pm$ | 0.07 | 9.53 | $\pm$ | 0.01 | 6.27  | $\pm$ | 0.09 | 19.08 | 67.16  | 32.84   |
| 11  | 1.16 | $\pm$ | 0.06 | 1.78 | $\pm$ | 0.12 | 7.01 | $\pm$ | 0.13 | 14.39 | $\pm$ | 0.32 | 24.34 | 40.89  | 59.11   |

Note: EFLE= easily, freely, leachable or exchangeable; AR= acid-reducible; OO- oxidisable-organic; RES= resistant; SUM= summation of the four geochemical fractions; NR= nonresistant.

**S-5.** Concentration (mean  $\pm$  SE,  $\mu\text{g/g}$  dry weight) of Zn in the geochemical fractions of the habitat topsoils of *Amaranthus viridis* collected from all sampling sites in Peninsular Malaysia.

| No. | EFLE |       |      | AR   |       |      | OO   |       |      | RES  |       |      | SUM  | NR (%) | RES (%) |
|-----|------|-------|------|------|-------|------|------|-------|------|------|-------|------|------|--------|---------|
| 1   | 2.32 | $\pm$ | 0.32 | 24.6 | $\pm$ | 0.49 | 28.1 | $\pm$ | 1.84 | 43.4 | $\pm$ | 0.47 | 98.4 | 55.88  | 44.12   |
| 2   | 2.36 | $\pm$ | 0.31 | 34.4 | $\pm$ | 0.64 | 20.4 | $\pm$ | 1.07 | 38.2 | $\pm$ | 1.51 | 95.4 | 59.96  | 40.04   |
| 3   | 1.45 | $\pm$ | 0.21 | 24.9 | $\pm$ | 0.31 | 76.1 | $\pm$ | 2.57 | 56.6 | $\pm$ | 4.16 | 159  | 64.43  | 35.57   |
| 4   | 2.39 | $\pm$ | 0.23 | 32.9 | $\pm$ | 0.83 | 93.5 | $\pm$ | 1.36 | 117  | $\pm$ | 2.65 | 246  | 52.44  | 47.56   |
| 5   | 2.83 | $\pm$ | 0.22 | 30.9 | $\pm$ | 0.52 | 25.9 | $\pm$ | 0.75 | 24.1 | $\pm$ | 0.73 | 83.8 | 71.25  | 28.75   |
| 6   | 5.73 | $\pm$ | 0.88 | 53.4 | $\pm$ | 1.68 | 80.9 | $\pm$ | 1.60 | 102  | $\pm$ | 3.88 | 242  | 57.79  | 42.21   |
| 7   | 1.47 | $\pm$ | 0.20 | 40.3 | $\pm$ | 1.42 | 57.8 | $\pm$ | 0.86 | 39.1 | $\pm$ | 0.46 | 139  | 71.81  | 28.19   |
| 8   | 5.90 | $\pm$ | 0.21 | 57.6 | $\pm$ | 2.53 | 81.4 | $\pm$ | 0.81 | 100  | $\pm$ | 2.12 | 246  | 58.97  | 41.03   |
| 9   | 2.04 | $\pm$ | 0.14 | 36.4 | $\pm$ | 1.45 | 52.5 | $\pm$ | 3.34 | 47.2 | $\pm$ | 1.51 | 138  | 65.86  | 34.14   |
| 10  | 2.35 | $\pm$ | 0.42 | 29.7 | $\pm$ | 0.91 | 36.4 | $\pm$ | 1.92 | 40.7 | $\pm$ | 0.46 | 109  | 62.70  | 37.30   |
| 11  | 1.38 | $\pm$ | 0.26 | 10.7 | $\pm$ | 0.22 | 15.8 | $\pm$ | 1.42 | 14.8 | $\pm$ | 0.50 | 42.7 | 65.41  | 34.59   |

Note: EFLE= easily, freely, leachable or exchangeable; AR= acid-reducible; OO- oxidisable-organic; RES= resistant; SUM= summation of the four geochemical fractions; NR= nonresistant.

**S-6.** Values of estimated daily intake (EDI,  $\mu\text{g/kg}$  wet weight/day) and target hazard quotient (THQ, unitless) values of Cd, Fe, Ni and Zn on the edible leaves of *Amaranthus viridis* from all the sampling sites in Peninsular Malaysia.

| Cd | Children |       | Adults |       |
|----|----------|-------|--------|-------|
|    | EDI      | THQ   | EDI    | THQ   |
| 1  | 0.13     | 0.131 | 0.06   | 0.059 |
| 2  | 0.11     | 0.114 | 0.05   | 0.052 |
| 3  | 0.13     | 0.134 | 0.06   | 0.061 |
| 4  | 0.18     | 0.182 | 0.08   | 0.082 |
| 5  | 0.29     | 0.285 | 0.13   | 0.129 |
| 6  | 0.08     | 0.079 | 0.04   | 0.036 |
| 7  | 0.06     | 0.059 | 0.03   | 0.027 |
| 8  | 0.14     | 0.136 | 0.06   | 0.061 |
| 9  | 0.14     | 0.141 | 0.06   | 0.064 |
| 10 | 0.12     | 0.119 | 0.05   | 0.054 |
| 11 | 0.11     | 0.112 | 0.05   | 0.050 |
| Fe | Children |       | Adults |       |
|    | EDI      | THQ   | EDI    | THQ   |
| 1  | 14.74    | 0.021 | 6.65   | 0.009 |
| 2  | 12.09    | 0.017 | 5.45   | 0.008 |
| 3  | 18.17    | 0.026 | 8.19   | 0.012 |
| 4  | 21.92    | 0.031 | 9.88   | 0.014 |
| 5  | 21.06    | 0.030 | 9.50   | 0.014 |
| 6  | 21.55    | 0.031 | 9.72   | 0.014 |
| 7  | 69.95    | 0.100 | 31.54  | 0.045 |
| 8  | 10.39    | 0.015 | 4.68   | 0.007 |
| 9  | 12.15    | 0.017 | 5.48   | 0.008 |
| 10 | 9.78     | 0.014 | 4.41   | 0.006 |
| 11 | 16.89    | 0.024 | 7.61   | 0.011 |
| Ni | Children |       | Adults |       |
|    | EDI      | THQ   | EDI    | THQ   |
| 1  | 0.83     | 0.042 | 0.38   | 0.019 |
| 2  | 0.53     | 0.027 | 0.24   | 0.012 |
| 3  | 0.72     | 0.036 | 0.33   | 0.016 |
| 4  | 0.87     | 0.044 | 0.39   | 0.020 |
| 5  | 0.40     | 0.020 | 0.18   | 0.009 |
| 6  | 0.27     | 0.014 | 0.12   | 0.006 |
| 7  | 0.48     | 0.024 | 0.22   | 0.011 |
| 8  | 0.26     | 0.013 | 0.12   | 0.006 |
| 9  | 0.80     | 0.040 | 0.36   | 0.018 |
| 10 | 0.58     | 0.029 | 0.26   | 0.013 |
| 11 | 0.97     | 0.049 | 0.44   | 0.022 |
| Zn | Children |       | Adults |       |
|    | EDI      | THQ   | EDI    | THQ   |
| 1  | 46.30    | 0.154 | 20.87  | 0.070 |
| 2  | 63.48    | 0.212 | 28.62  | 0.095 |
| 3  | 12.79    | 0.043 | 5.77   | 0.019 |

|    |       |       |       |       |
|----|-------|-------|-------|-------|
| 4  | 11.93 | 0.040 | 5.38  | 0.018 |
| 5  | 20.74 | 0.069 | 9.35  | 0.031 |
| 6  | 10.36 | 0.035 | 4.67  | 0.016 |
| 7  | 8.53  | 0.028 | 3.85  | 0.013 |
| 8  | 68.19 | 0.227 | 30.74 | 0.102 |
| 9  | 29.67 | 0.099 | 13.38 | 0.045 |
| 10 | 58.20 | 0.194 | 26.24 | 0.087 |
| 11 | 11.13 | 0.037 | 5.02  | 0.017 |

Note: The dry weight basis of heavy metal concentrations in the edible leaves of *Amaranthus viridis* was converted to wet weight basis by using a conversion factor of 0.12.

**S-7.** Values of bioconcentration factors (BCF) of Cd, Fe, Ni and Zn on the leaves, stems and roots of *Amaranthus viridis* from all the sampling sites in Peninsular Malaysia.

| Cd | BCF <sub>leaf/EFLE</sub> | BCF <sub>leaf/SUM</sub> | BCF <sub>stem/EFLE</sub> | BCF <sub>stem/SUM</sub> | BCF <sub>root/EFLE</sub> | BCF <sub>root/SUM</sub> |
|----|--------------------------|-------------------------|--------------------------|-------------------------|--------------------------|-------------------------|
| 1  | 5.48                     | 0.34                    | 4.38                     | 0.27                    | 6.63                     | 0.41                    |
| 2  | 3.40                     | 0.22                    | 5.73                     | 0.36                    | 6.67                     | 0.42                    |
| 3  | 3.59                     | 0.21                    | 3.51                     | 0.21                    | 5.78                     | 0.34                    |
| 4  | 3.78                     | 0.27                    | 2.92                     | 0.21                    | 5.49                     | 0.39                    |
| 5  | 4.83                     | 0.46                    | 3.92                     | 0.37                    | 5.44                     | 0.51                    |
| 6  | 2.35                     | 0.16                    | 1.90                     | 0.13                    | 5.17                     | 0.35                    |
| 7  | 2.06                     | 0.10                    | 2.37                     | 0.12                    | 6.84                     | 0.35                    |
| 8  | 5.70                     | 0.31                    | 2.00                     | 0.11                    | 7.06                     | 0.39                    |
| 9  | 5.04                     | 0.51                    | 3.27                     | 0.33                    | 4.34                     | 0.44                    |
| 10 | 2.56                     | 0.31                    | 1.02                     | 0.12                    | 3.04                     | 0.37                    |
| 11 | 3.09                     | 0.30                    | 1.02                     | 0.10                    | 2.52                     | 0.24                    |
| Fe | BCF <sub>leaf/EFLE</sub> | BCF <sub>leaf/SUM</sub> | BCF <sub>stem/EFLE</sub> | BCF <sub>stem/SUM</sub> | BCF <sub>root/EFLE</sub> | BCF <sub>root/SUM</sub> |
| 1  | 144.90                   | 0.011                   | 56.03                    | 0.004                   | 153.34                   | 0.012                   |
| 2  | 229.09                   | 0.011                   | 114.43                   | 0.005                   | 304.37                   | 0.015                   |
| 3  | 179.72                   | 0.002                   | 132.06                   | 0.002                   | 1277.18                  | 0.017                   |
| 4  | 128.11                   | 0.003                   | 55.03                    | 0.001                   | 195.68                   | 0.005                   |
| 5  | 240.91                   | 0.005                   | 85.24                    | 0.002                   | 411.10                   | 0.008                   |
| 6  | 118.67                   | 0.010                   | 37.20                    | 0.003                   | 265.06                   | 0.023                   |
| 7  | 972.74                   | 0.026                   | 316.72                   | 0.009                   | 1121.71                  | 0.030                   |
| 8  | 97.09                    | 0.004                   | 55.35                    | 0.002                   | 193.97                   | 0.009                   |
| 9  | 218.24                   | 0.005                   | 112.45                   | 0.003                   | 594.20                   | 0.015                   |
| 10 | 173.67                   | 0.007                   | 64.39                    | 0.002                   | 236.12                   | 0.009                   |
| 11 | 287.51                   | 0.003                   | 103.99                   | 0.001                   | 577.20                   | 0.006                   |
| Ni | BCF <sub>leaf/EFLE</sub> | BCF <sub>leaf/SUM</sub> | BCF <sub>stem/EFLE</sub> | BCF <sub>stem/SUM</sub> | BCF <sub>root/EFLE</sub> | BCF <sub>root/SUM</sub> |
| 1  | 9.80                     | 0.60                    | 2.35                     | 0.14                    | 7.26                     | 0.44                    |
| 2  | 5.68                     | 0.27                    | 3.07                     | 0.15                    | 9.18                     | 0.44                    |
| 3  | 22.12                    | 0.62                    | 7.56                     | 0.21                    | 11.72                    | 0.33                    |
| 4  | 7.85                     | 0.83                    | 3.31                     | 0.35                    | 7.08                     | 0.75                    |
| 5  | 4.05                     | 0.22                    | 1.43                     | 0.08                    | 7.03                     | 0.38                    |
| 6  | 2.86                     | 0.14                    | 0.51                     | 0.02                    | 6.53                     | 0.32                    |
| 7  | 2.41                     | 0.33                    | 0.56                     | 0.08                    | 0.73                     | 0.10                    |
| 8  | 2.13                     | 0.25                    | 0.56                     | 0.07                    | 3.81                     | 0.44                    |

|    |                          |                         |                          |                         |                          |                         |
|----|--------------------------|-------------------------|--------------------------|-------------------------|--------------------------|-------------------------|
| 9  | 3.88                     | 0.25                    | 1.62                     | 0.10                    | 0.73                     | 0.05                    |
| 10 | 2.59                     | 0.23                    | 1.04                     | 0.09                    | 2.31                     | 0.21                    |
| 11 | 6.42                     | 0.31                    | 2.41                     | 0.12                    | 2.00                     | 0.10                    |
| Zn | BCF <sub>leaf/EFLE</sub> | BCF <sub>leaf/SUM</sub> | BCF <sub>stem/EFLE</sub> | BCF <sub>stem/SUM</sub> | BCF <sub>root/EFLE</sub> | BCF <sub>root/SUM</sub> |
| 1  | 152.74                   | 3.60                    | 79.53                    | 1.87                    | 79.39                    | 1.87                    |
| 2  | 205.58                   | 5.09                    | 80.83                    | 2.00                    | 78.73                    | 1.95                    |
| 3  | 67.45                    | 0.61                    | 39.43                    | 0.36                    | 57.26                    | 0.52                    |
| 4  | 38.09                    | 0.37                    | 25.56                    | 0.25                    | 41.91                    | 0.41                    |
| 5  | 56.11                    | 1.89                    | 40.70                    | 1.37                    | 44.04                    | 1.49                    |
| 6  | 13.82                    | 0.33                    | 9.10                     | 0.22                    | 9.72                     | 0.23                    |
| 7  | 44.36                    | 0.47                    | 52.33                    | 0.56                    | 50.29                    | 0.53                    |
| 8  | 88.40                    | 2.12                    | 57.83                    | 1.39                    | 60.56                    | 1.45                    |
| 9  | 111.01                   | 1.64                    | 65.98                    | 0.98                    | 79.04                    | 1.17                    |
| 10 | 189.34                   | 4.08                    | 80.29                    | 1.73                    | 101.07                   | 2.18                    |
| 11 | 61.48                    | 1.99                    | 48.47                    | 1.57                    | 48.12                    | 1.56                    |

**S-8.** Values of translocation factors (TF) of Cd, Fe, Ni and Zn on the leaves, stems and roots of *Amaranthus viridis* from all the sampling sites in Peninsular Malaysia.

|     | TF <sub>leaf/root</sub> | TF <sub>stem/root</sub> | TF <sub>leaf/root</sub> | TF <sub>stem/root</sub> |
|-----|-------------------------|-------------------------|-------------------------|-------------------------|
| No. | Cd                      |                         | Fe                      |                         |
| 1   | 0.83                    | 0.66                    | 0.94                    | 0.37                    |
| 2   | 0.51                    | 0.86                    | 0.75                    | 0.38                    |
| 3   | 0.62                    | 0.61                    | 0.14                    | 0.10                    |
| 4   | 0.69                    | 0.53                    | 0.65                    | 0.28                    |
| 5   | 0.89                    | 0.72                    | 0.59                    | 0.21                    |
| 6   | 0.45                    | 0.37                    | 0.45                    | 0.14                    |
| 7   | 0.30                    | 0.35                    | 0.87                    | 0.28                    |
| 8   | 0.81                    | 0.28                    | 0.50                    | 0.29                    |
| 9   | 1.16                    | 0.75                    | 0.37                    | 0.19                    |
| 10  | 0.84                    | 0.33                    | 0.74                    | 0.27                    |
| 11  | 1.23                    | 0.41                    | 0.50                    | 0.18                    |
| No. | Ni                      |                         | Zn                      |                         |
| 1   | 1.35                    | 0.32                    | 1.92                    | 1.00                    |
| 2   | 0.62                    | 0.33                    | 2.61                    | 1.03                    |
| 3   | 1.89                    | 0.65                    | 1.18                    | 0.69                    |
| 4   | 1.11                    | 0.47                    | 0.91                    | 0.61                    |
| 5   | 0.58                    | 0.20                    | 1.27                    | 0.92                    |
| 6   | 0.44                    | 0.08                    | 1.42                    | 0.94                    |
| 7   | 3.29                    | 0.77                    | 0.88                    | 1.04                    |
| 8   | 0.56                    | 0.15                    | 1.46                    | 0.95                    |
| 9   | 5.34                    | 2.23                    | 1.40                    | 0.83                    |
| 10  | 1.12                    | 0.45                    | 1.87                    | 0.79                    |
| 11  | 3.21                    | 1.21                    | 1.28                    | 1.01                    |
